# Supplementary material for: Quantitation of the immunodominant 33-mer peptide from α-gliadin in wheat flours by liquid chromatography tandem mass spectrometry
Source: PubMed Central journal article supplement (PMC5361186; doi:10.1038/srep45092), 2017-03-22
Supplement: srep45092-s1.pdf [file srep45092-s1.pdf]

## Quantitation of the immunodominant 33-mer peptide from $\alpha$ -gliadin in wheat flours by liquid chromatography tandem mass spectrometry

Kathrin Schalk, Christina Lang, Herbert Wieser, Peter Koehler, and Katharina Anne Scherf

### Supplementary Table S1.

Contents of  $\alpha$ -gliadin, gliadin, gluten, and crude protein [%] in flours of different modern and old common wheat and spelt cultivars.

| Wheat cultivar | $\alpha$ -Gliadin [%] <sup>1</sup> | Gliadin [%] <sup>1</sup> | Gluten [%] <sup>1</sup> | Crude protein [%] <sup>1</sup> |
|----------------|------------------------------------|--------------------------|-------------------------|--------------------------------|
| CHA            | 3.2 ± 0.0                          | 6.5 ± 0.0                | 9.2 ± 0.2               | 11.3 ± 0.1                     |
| FRA            | 2.9 ± 0.1                          | 7.2 ± 0.0                | 9.5 ± 0.1               | 11.3 ± 0.0                     |
| WES            | 3.1 ± 0.3                          | 6.9 ± 0.0                | 9.6 ± 0.4               | 11.9 ± 0.2                     |
| WYA            | 3.2 ± 0.0                          | 7.2 ± 0.0                | 10.0 ± 0.0              | 11.7 ± 0.1                     |
| WYW            | 2.8 ± 0.0                          | 6.4 ± 0.0                | 8.8 ± 0.0               | 10.7 ± 0.1                     |
| YIT            | 3.0 ± 0.0                          | 6.5 ± 0.0                | 9.5 ± 0.1               | 11.0 ± 0.1                     |
| MUL            | 3.0 ± 0.1                          | 5.7 ± 0.0                | 8.4 ± 0.0               | 10.3 ± 0.1                     |
| CAP            | 5.2 ± 0.1                          | 10.1 ± 0.0               | 12.5 ± 0.1              | 14.9 ± 0.1                     |
| Y11            | 3.9 ± 0.0                          | 7.5 ± 0.0                | 11.0 ± 0.0              | 12.4 ± 0.2                     |
| Y12            | 3.4 ± 0.1                          | 6.6 ± 0.0                | 9.5 ± 0.0               | 11.6 ± 0.1                     |
| Y14            | 5.4 ± 0.2                          | 10.3 ± 0.1               | 13.7 ± 0.2              | 16.5 ± 0.1                     |
| CAY            | 3.7 ± 0.3                          | 7.7 ± 0.2                | 10.5 ± 0.1              | 13.2 ± 0.2                     |
| CAR            | 4.6 ± 0.4                          | 9.1 ± 0.2                | 11.8 ± 0.4              | 15.4 ± 0.1                     |
| GPS            | 3.0 ± 0.1                          | 7.2 ± 0.0                | 9.7 ± 0.0               | 11.8 ± 0.0                     |
| GSW            | 3.2 ± 0.0                          | 7.6 ± 0.0                | 10.3 ± 0.1              | 12.4 ± 0.1                     |
| GEF            | 3.6 ± 0.0                          | 8.5 ± 0.0                | 11.5 ± 0.0              | 13.7 ± 0.2                     |
| GLE            | 3.7 ± 0.1                          | 7.6 ± 0.1                | 11.1 ± 0.2              | 12.8 ± 0.1                     |
| A13            | 3.9 ± 0.1                          | 7.7 ± 0.3                | 11.4 ± 0.4              | 13.1 ± 0.0                     |
| A14            | 4.1 ± 0.0                          | 8.0 ± 0.0                | 11.6 ± 0.0              | 13.6 ± 0.1                     |
| D05            | 3.6 ± 0.0                          | 7.2 ± 0.0                | 10.4 ± 0.0              | 12.6 ± 0.1                     |
| D11            | 2.5 ± 0.0                          | 5.1 ± 0.0                | 7.1 ± 0.0               | 9.2 ± 0.1                      |
| TOM            | 3.4 ± 0.0                          | 6.5 ± 0.1                | 9.2 ± 0.1               | 11.0 ± 0.1                     |
| WIN            | 2.7 ± 0.1                          | 5.4 ± 0.0                | 6.8 ± 0.1               | 8.6 ± 0.1                      |
| ABD            | 2.2 ± 0.4                          | 5.0 ± 0.1                | 6.0 ± 0.2               | 9.1 ± 0.1                      |
| BED            | 2.0 ± 0.0                          | 4.4 ± 0.1                | 6.2 ± 0.1               | 9.7 ± 0.0                      |
| CGS            | 2.4 ± 0.1                          | 5.1 ± 0.3                | 7.3 ± 0.5               | 12.2 ± 1.2                     |
| DSW            | 2.5 ± 0.1                          | 6.1 ± 0.2                | 8.1 ± 0.2               | 12.1 ± 0.0                     |
| EBR            | 3.0 ± 0.0                          | 6.3 ± 0.0                | 8.6 ± 0.2               | 11.4 ± 0.1                     |
| FIR            | 2.9 ± 0.0                          | 7.0 ± 0.3                | 9.7 ± 0.2               | 13.0 ± 0.2                     |
| JFK            | 2.6 ± 0.0                          | 5.3 ± 0.0                | 6.9 ± 0.1               | 11.2 ± 0.2                     |
| KSI            | 2.7 ± 0.1                          | 5.7 ± 0.0                | 7.6 ± 0.3               | 11.1 ± 0.2                     |
| RPD            | 2.1 ± 0.1                          | 4.3 ± 0.3                | 6.0 ± 0.4               | 9.4 ± 0.1                      |
| RFB            | 1.6 ± 0.2                          | 3.3 ± 0.1                | 4.9 ± 0.7               | 8.5 ± 0.2                      |

|     |           |           |            |            |
|-----|-----------|-----------|------------|------------|
| RBL | 3.5 ± 0.0 | 7.3 ± 0.0 | 8.3 ± 0.5  | 12.3 ± 0.1 |
| SLD | 2.9 ± 0.0 | 6.0 ± 0.1 | 8.4 ± 0.0  | 12.3 ± 0.3 |
| STM | 2.7 ± 0.3 | 6.0 ± 0.4 | 8.4 ± 0.2  | 11.5 ± 0.0 |
| STD | 1.7 ± 0.1 | 4.1 ± 0.3 | 5.6 ± 0.4  | 8.8 ± 0.1  |
| WOP | 3.1 ± 0.0 | 6.6 ± 0.0 | 8.9 ± 0.3  | 12.3 ± 0.1 |
| M11 | 3.0 ± 0.1 | 6.3 ± 0.0 | 9.0 ± 0.1  | 10.6 ± 0.2 |
| M12 | 3.0 ± 0.0 | 6.4 ± 0.1 | 8.9 ± 0.1  | 11.1 ± 0.1 |
| M14 | 2.8 ± 0.0 | 6.0 ± 0.1 | 8.7 ± 0.1  | 11.0 ± 0.1 |
| Z11 | 3.1 ± 0.0 | 6.2 ± 0.0 | 8.7 ± 0.2  | 10.3 ± 0.1 |
| Z12 | 4.2 ± 0.1 | 8.6 ± 0.1 | 12.0 ± 0.0 | 13.9 ± 0.2 |
| Z14 | 3.6 ± 0.1 | 7.6 ± 0.0 | 11.5 ± 0.1 | 13.0 ± 0.1 |
| V11 | 3.0 ± 0.1 | 6.3 ± 0.0 | 8.2 ± 0.0  | 9.8 ± 0.2  |
| V12 | 4.1 ± 0.0 | 8.0 ± 0.0 | 10.9 ± 0.3 | 12.4 ± 0.2 |
| V14 | 3.6 ± 0.0 | 7.4 ± 0.0 | 10.6 ± 0.2 | 12.5 ± 0.0 |
| MJO | 2.2 ± 0.0 | 3.9 ± 0.0 | 6.3 ± 0.1  | 9.3 ± 0.1  |
| BEZ | 3.6 ± 0.0 | 7.0 ± 0.0 | 9.5 ± 0.1  | 11.4 ± 0.0 |
| FRK | 2.8 ± 0.1 | 6.4 ± 0.3 | 8.1 ± 0.4  | 12.8 ± 0.1 |
| OBE | 4.3 ± 0.1 | 9.3 ± 0.1 | 11.5 ± 0.3 | 16.9 ± 0.1 |

<sup>1</sup> mean value ± standard deviation (n = 3) based on flour weight

## Supplementary Table S2.

Contents of 33-mer in flours of different modern and old common wheat and spelt cultivars and the significance of differences in 33-mer contents between the 51 flour samples.

| Wheat cultivar | 33-mer [ $\mu\text{g/g}$ ] <sup>1</sup> in flour | Significant differences <sup>2</sup> |
|----------------|--------------------------------------------------|--------------------------------------|
| CHA            | 341.7 $\pm$ 4.2                                  | QRSTUVWXYZd                          |
| FRA            | 423.4 $\pm$ 20.3                                 | IJKO                                 |
| WES            | 351.5 $\pm$ 12.2                                 | PQRSTUVWXYZb                         |
| WYA            | 370.7 $\pm$ 7.1                                  | OTb                                  |
| WYW            | 305.1 $\pm$ 16.5                                 | WXYZcek                              |
| YIT            | 441.4 $\pm$ 17.3                                 | HIJKN                                |
| MUL            | 363.9 $\pm$ 11.3                                 | OZ                                   |
| CAP            | 460.2 $\pm$ 13.7                                 | DEFGHIJK                             |
| Y11            | 415.3 $\pm$ 47.7                                 | JKOP                                 |
| Y12            | 370.0 $\pm$ 14.1                                 | OU                                   |
| Y14            | 602.6 $\pm$ 33.4                                 | A                                    |
| CAY            | 291.7 $\pm$ 6.3                                  | Lmnos                                |
| CAR            | 229.4 $\pm$ 19.7                                 | abcdefghijkl                         |
| GPS            | 215.6 $\pm$ 7.5                                  | pqrs                                 |
| GSW            | 213.4 $\pm$ 12.9                                 | pqrs                                 |
| GEF            | 252.8 $\pm$ 7.4                                  | jp                                   |
| GLE            | 462.6 $\pm$ 18.9                                 | DEFGHIJK                             |
| A13            | 519.0 $\pm$ 18.1                                 | BE                                   |
| A14            | 527.1 $\pm$ 27.2                                 | BC                                   |
| D05            | 509.2 $\pm$ 26.1                                 | BG                                   |
| D11            | 330.9 $\pm$ 5.9                                  | RSTUVWXYZg                           |
| TOM            | 399.5 $\pm$ 19.6                                 | KOQ                                  |
| WIN            | 367.0 $\pm$ 21.0                                 | OX                                   |
| ABD            | 90.9 $\pm$ 1.5                                   | t                                    |
| BED            | 234.3 $\pm$ 12.0                                 | lmnor                                |
| CGS            | 317.1 $\pm$ 23.1                                 | STUVWXYZi                            |
| DSW            | 331.7 $\pm$ 18.0                                 | RSTUVWXYZf                           |
| EBR            | 348.3 $\pm$ 6.1                                  | QRSTUVWXYZc                          |
| FIR            | 325.5 $\pm$ 8.6                                  | RSTUVWXYZh                           |
| JFK            | 283.5 $\pm$ 19.6                                 | defghijko                            |
| KSI            | 290.1 $\pm$ 16.4                                 | abcdefghijklm                        |
| RPD            | 239.0 $\pm$ 3.8                                  | lmnoq                                |
| RFB            | 179.7 $\pm$ 5.5                                  | qrs                                  |
| RBL            | 332.4 $\pm$ 7.0                                  | RSTUVWXYZe                           |
| SLD            | 528.0 $\pm$ 22.5                                 | B                                    |
| STM            | 309.0 $\pm$ 17.9                                 | TUVWXYZj                             |
| STD            | 200.8 $\pm$ 10.6                                 | pqrs                                 |
| WOP            | 365.6 $\pm$ 16.4                                 | OY                                   |
| M11            | 380.0 $\pm$ 12.8                                 | NOS                                  |
| M12            | 369.9 $\pm$ 11.9                                 | OV                                   |
| M14            | 503.6 $\pm$ 1.7                                  | BH                                   |
| Z11            | 287.8 $\pm$ 43.3                                 | abcdefghijklkn                       |
| Z12            | 472.2 $\pm$ 34.7                                 | CEFGHIJ                              |
| Z14            | 548.8 $\pm$ 13.4                                 | AB                                   |
| V11            | 384.0 $\pm$ 15.8                                 | MNOR                                 |

---

|     |              |              |
|-----|--------------|--------------|
| V12 | 484.7 ± 25.4 | BHI          |
| V14 | 355.1 ± 22.9 | PQRSTUVWXYZa |
| MJO | 515.0 ± 2.7  | BF           |
| BEZ | 442.4 ± 10.1 | HIJKM        |
| FRK | 353.9 ± 24.1 | OW           |
| OBE | 523.4 ± 53.5 | BD           |

---

<sup>1</sup> Mean value ± standard deviation (n = 3)

<sup>2</sup> Different letters denote significant differences (p < 0.05, one-way ANOVA, Tukey's test) between the 33-mer contents

### Supplementary Table S3.

Contents of 33-mer in  $\alpha$ -gliadin of different modern and old common wheat and spelt cultivars and the significance of differences in 33-mer contents between the 51 flour samples.

| Wheat cultivar | 33-mer [mg/g] <sup>1</sup> in $\alpha$ -gliadin | Significant differences <sup>2</sup> |
|----------------|-------------------------------------------------|--------------------------------------|
| CHA            | 10.8 ± 0.1                                      | OPQRSTUVWXYZabf                      |
| FRA            | 14.4 ± 0.7                                      | CE                                   |
| WES            | 11.2 ± 0.4                                      | LNOPQRSTUVWXYZab                     |
| WYA            | 11.7 ± 0.2                                      | HTY                                  |
| WYW            | 11.0 ± 0.6                                      | MNOPQRSTUVWXYZabf                    |
| YIT            | 15.0 ± 0.6                                      | CD                                   |
| MUL            | 12.3 ± 0.4                                      | FGHIT                                |
| CAP            | 8.8 ± 0.3                                       | ghi                                  |
| Y11            | 10.8 ± 1.2                                      | OPQRSTUVWXYZabf                      |
| Y12            | 11.0 ± 0.4                                      | MNOPQRSTUVWXYZabf                    |
| Y14            | 11.1 ± 0.6                                      | LMNOPQRSTUVWXYZad                    |
| CAY            | 6.3 ± 0.2                                       | jk                                   |
| CAR            | 6.3 ± 0.4                                       | jk                                   |
| GPS            | 7.2 ± 0.2                                       | ij                                   |
| GSW            | 6.7 ± 0.4                                       | jk                                   |
| GEF            | 7.1 ± 0.2                                       | ik                                   |
| GLE            | 12.4 ± 0.5                                      | FGHIQ                                |
| A13            | 13.2 ± 0.5                                      | DEFGHIJ                              |
| A14            | 13.0 ± 0.7                                      | DEFGHIL                              |
| D05            | 14.1 ± 0.7                                      | CF                                   |
| D11            | 13.1 ± 0.2                                      | DEFGHIK                              |
| TOM            | 11.8 ± 0.6                                      | HIX                                  |
| WIN            | 13.8 ± 0.8                                      | CG                                   |
| ABD            | 4.1 ± 0.1                                       | j                                    |
| BED            | 12.0 ± 0.6                                      | GHIU                                 |
| CGS            | 13.5 ± 1.0                                      | CH                                   |
| DSW            | 13.3 ± 0.7                                      | CI                                   |
| EBR            | 11.4 ± 0.2                                      | JKLMNOPQRSTUVWXYZab                  |
| FIR            | 11.1 ± 0.3                                      | MIYf                                 |
| JFK            | 11.1 ± 0.8                                      | MNPQRSTUVWXYZab                      |
| KSI            | 10.6 ± 0.6                                      | OPQRSTUVWXYZabc                      |
| RPD            | 11.6 ± 0.2                                      | HIZ                                  |
| RFB            | 11.1 ± 0.3                                      | LMNOPQRSTUVWXYZabc                   |
| RBL            | 9.4 ± 0.2                                       | cdefg                                |
| SLD            | 18.2 ± 0.8                                      | B                                    |
| STM            | 11.5 ± 0.7                                      | IYa                                  |
| STD            | 11.5 ± 0.6                                      | IYb                                  |
| WOP            | 12.0 ± 0.5                                      | GHIV                                 |
| M11            | 12.8 ± 0.4                                      | EFGHIN                               |
| M12            | 12.4 ± 0.4                                      | FGHIO                                |
| M14            | 18.2 ± 0.1                                      | B                                    |
| Z11            | 9.6 ± 1.4                                       | Zabfh                                |
| Z12            | 11.3 ± 0.8                                      | JKLMNOPQRSTUVWXYZab                  |
| Z14            | 15.1 ± 0.4                                      | C                                    |

---

|     |             |         |
|-----|-------------|---------|
| V11 | 12.4 ± 0.5  | FGHIP   |
| V12 | 11.9 ± 0.6  | GHIW    |
| V14 | 9.8 ± 0.6   | Yzg     |
| MJO | 23.2 ± 0.1  | A       |
| BEZ | 12.3 ± 0.3  | FGHIS   |
| FRK | 12.4 ± 0.8  | DEFGHIM |
| OBE | 12.3 ± 1.25 | FGHIR   |

---

<sup>1</sup> Mean value ± standard deviation (n = 3)

<sup>2</sup> Different letters denote significant differences (p < 0.05, one-way ANOVA, Tukey's test) between the 33-mer contents
